# Supplementary material
Source: PubMed Central journal article supplement (PMC5340999)
Supplement: 10.1074_M116.065425_mcp.M116.065425-9.pdf [file 10.1074_M116.065425_mcp.M116.065425-9.pdf]

Supplemental Table S7: The Z-disc protein compendium.

| protein names                                                    | murine gene names     | identified in this study | identified as phospho protein | MW [kDa] | sarcomeric subunit  | additional name                                                                                            | note                      | references                                                                                   |
|------------------------------------------------------------------|-----------------------|--------------------------|-------------------------------|----------|---------------------|------------------------------------------------------------------------------------------------------------|---------------------------|----------------------------------------------------------------------------------------------|
| <b>Protein 3425401B19Rik</b>                                     | <i>3425401 B19Rik</i> | x                        | x                             | 154.48   | Z-disc              | CEFIP                                                                                                      |                           | Dierck <i>et al</i> , 2013                                                                   |
| <b>Alpha-actinin-2</b>                                           | <i>Actn2</i>          | x                        |                               | 103.83   | Z-disc              | Alpha-actinin skeletal muscle isoform 2, F-actin cross-linking protein                                     |                           | Ribeiro <i>et al</i> , 2014                                                                  |
| <b>Alpha-actinin-3</b>                                           | <i>Actn3</i>          | x                        | x                             | 103.04   | Z-disc              | Alpha-actinin skeletal muscle isoform 3                                                                    |                           | Beggs <i>et al</i> , 1992                                                                    |
| <b>Ankyrin-2</b>                                                 | <i>Ank2</i>           | x                        |                               | 432.86   | membrane-associated | Ankyrin-B, Brain ankyrin                                                                                   |                           | Mohler <i>et al</i> , 2005                                                                   |
| <b>Ankyrin repeat domain-containing protein 1</b>                | <i>Ankrd1</i>         | x                        |                               | 36.00    | Z-disc              | ardiac ankyrin repeat protein, CARP, MCARP                                                                 |                           | Bang <i>et al</i> , 2001                                                                     |
| <b>Ankyrin repeat domain-containing protein 2</b>                | <i>Ankrd2</i>         | x                        | x                             | 39.86    | Z-disc associated   | ARPP, Skeletal muscle ankyrin repeat protein                                                               | also shuttling to nucleus | Kojic <i>et al</i> , 2004; Jasnic-Savovic <i>et al</i> , 2015; Tsukamoto <i>et al</i> , 2002 |
| <b>BAG family molecular chaperone regulator 3</b>                | <i>Bag3</i>           | x                        | x                             | 61.86    | Z-disc              | Bcl-2-associated athanogene 3, BIS                                                                         |                           | Homma <i>et al</i> , 2006                                                                    |
| <b>Voltage-dependent L-type calcium channel subunit alpha-1C</b> | <i>Cacna1c</i>        | x                        |                               | 240.14   | membrane-associated | CACNL1A1, Cav1.2,                                                                                          |                           | Christel <i>et al</i> , 2012                                                                 |
| <b>Voltage-dependent L-type calcium channel subunit alpha-1D</b> | <i>Cacna1d</i>        |                          |                               | 247.06   | membrane-associated | Voltage-gated calcium channel subunit alpha Cav1.3, Calcium channel, L type, alpha-1 polypeptide isoform 2 |                           | Lu <i>et al</i> , 2007                                                                       |

| protein names                                  | murine gene names | identified in this study | identified as phospho protein | MW [kDa] | sarcomeric subunit    | additional name                                             | note                      | references                                                 |
|------------------------------------------------|-------------------|--------------------------|-------------------------------|----------|-----------------------|-------------------------------------------------------------|---------------------------|------------------------------------------------------------|
| <b>Calpain-3</b>                               | <i>Capn3</i>      | x                        | x                             | 94.24    | Z-disc associated     | Calcium-activated neutral proteinase 3, LGMD2A, Calpain p94 |                           | Goll <i>et al</i> , 1991                                   |
| <b>F-actin-capping protein subunit alpha-1</b> | <i>Capza1</i>     | x                        |                               | 32.94    | Z-disc                | CapZ alpha-1                                                |                           | Casella <i>et al</i> , 1987                                |
| <b>F-actin-capping protein subunit alpha-2</b> | <i>Capza2</i>     | x                        |                               | 32.97    | Z-disc                | CapZ alpha-2                                                |                           | Casella <i>et al</i> , 1987                                |
| <b>F-actin-capping protein subunit beta</b>    | <i>Capzb</i>      | x                        | x                             | 31.35    | Z-disc                | CapZ beta                                                   |                           | Caldwell <i>et al</i> , 1989                               |
| <b>Calsequestrin-1</b>                         | <i>Casq1</i>      | x                        |                               | 46.38    | membrane-associated   | Calmitin, calcium-sequestering protein                      | sarcoplasmic reticulum    | MacLennan & Wong, 1971; Scott <i>et al</i> , 1988          |
| <b>Caveolin-1</b>                              | <i>Cav1</i>       | x                        |                               | 20.54    | membrane-associated   | BSCL3                                                       | caveolae                  | Williams & Lisanti, 2004                                   |
| <b>Alpha-crystallin B chain</b>                | <i>Cryab</i>      | x                        | x                             | 20.07    | Z-disc associated     | Alpha(B)-crystallin, Heat shock protein beta-5, HspB5       | also shuttling to nucleus | Koh & Escobedo, 2004                                       |
| <b>Catenin alpha-1</b>                         | <i>Ctnna1</i>     | x                        | x                             | 100.11   | peripheral            | Alpha E-catenin, Cadherin-associated protein                | Costamere                 | Chopra <i>et al</i> , 2012                                 |
| <b>Catenin beta-1</b>                          | <i>Ctnnb1</i>     | x                        | x                             | 85.47    | peripheral            | beta-catenin, CTNNB                                         | Costamere                 | Kurth <i>et al</i> , 1996                                  |
| <b>Dystroglycan</b>                            | <i>Dag1</i>       | x                        |                               | 96.90    | membrane-associated   | Dystrophin-associated glycoprotein 1                        |                           | Durbeej <i>et al</i> , 1998                                |
| <b>Desmin</b>                                  | <i>Des</i>        | x                        |                               | 53.50    | intermediate filament | CMD11, CSM1, CSM2, Desmin                                   |                           | Richardson <i>et al</i> , 1981; Clemen <i>et al</i> , 2013 |

| protein names                            | murine gene names | identified in this study | identified as phospho protein | MW [kDa] | sarcomeric subunit  | additional name                                                                                 | note | references                                                       |
|------------------------------------------|-------------------|--------------------------|-------------------------------|----------|---------------------|-------------------------------------------------------------------------------------------------|------|------------------------------------------------------------------|
| <b>Dystrophin</b>                        | <i>Dmd</i>        |                          |                               | 425.83   | membrane-associated | Duchenne muscular dystrophy                                                                     |      | Belkin & Burridge, 1994                                          |
| <b>DnaJ homolog subfamily B member 6</b> | <i>Dnajb6</i>     | x                        |                               | 39.81    | Z-disc associated   | DJ4, DnaJ homolog subfamily B member 6, Heat shock protein J2, MSJ1                             |      | Sarparanta <i>et al</i> , 2012                                   |
| <b>Dystonin</b>                          | <i>Dst</i>        | x                        | x                             | 870.52   | peripheral          | BPAG1, Bullous pemphigoid antigen 1, Dystonia musculorum protein, Hemidesmosomal plaque protein |      | Steiner-Champlaud <i>et al</i> , 2010, Boyer <i>et al</i> , 2010 |
| <b>Dystrobrevin alpha</b>                | <i>Dtna</i>       | x                        | x                             | 84.07    | membrane-associated | Dystrophin-related protein 3                                                                    |      | Peters <i>et al</i> , 1998                                       |
| <b>Dystrobrevin beta</b>                 | <i>Dtnb</i>       | x                        | x                             | 74.40    | membrane-associated | -                                                                                               |      | Peters <i>et al</i> , 1998                                       |
| <b>Dysferlin</b>                         | <i>Dysf</i>       | x                        |                               | 237.91   | membrane-associated | Fer-1-like protein 1, LGMD2B                                                                    |      | Matsuda <i>et al</i> , 2001; Minetti <i>et al</i> , 1992         |
| <b>Protein enabled homolog</b>           | <i>Enah</i>       | x                        | x                             | 83.98    | Z-disc              | ENA, MENA, Protein enabled homolog                                                              |      | Benz <i>et al</i> , 2013                                         |
| <b>Protein 4.1</b>                       | <i>Epb41</i>      |                          |                               | 95.91    | peripheral          | 4.1R, Band 4.1                                                                                  |      | Pinder <i>et al</i> , 2012                                       |
| <b>Band 4.1-like protein 1</b>           | <i>Epb41l1</i>    | x                        | x                             | 98.31    | peripheral          | 4.1N, Band 4.1-like protein 1                                                                   |      | Pinder <i>et al</i> , 2012                                       |
| <b>Ena/VASP-like protein</b>             | <i>Evl</i>        | x                        | x                             | 44.34    | Z-disc              | Ena/vasodilator-stimulated phosphoprotein-like                                                  |      | van der Ven <i>et al</i> , 2006                                  |
| <b>F-box and leucine-rich protein 22</b> | <i>Fbxl22</i>     |                          |                               | 26.32    | Z-disc associated   | F-box/LRR-repeat protein 22                                                                     |      | Spaich <i>et al</i> , 2012                                       |
| <b>Filamin-C</b>                         | <i>Flnc</i>       | x                        | x                             | 291.12   | Z-disc              | ABP-280-like protein, FLN2, gamma filamin                                                       |      | Thompson <i>et al</i> , 2000                                     |

| protein names                                                                   | murine gene names | identified in this study | identified as phospho protein | MW [kDa] | sarcomeric subunit  | additional name                                                                       | note                       | references                                                                          |
|---------------------------------------------------------------------------------|-------------------|--------------------------|-------------------------------|----------|---------------------|---------------------------------------------------------------------------------------|----------------------------|-------------------------------------------------------------------------------------|
| <b>Glutamate receptor ionotropic, NMDA 2B</b>                                   | <i>Grin2b</i>     |                          |                               | 165.96   | membrane-associated | N-methyl D-aspartate receptor subtype 2B, NR3, NR2B                                   |                            | Seeber et al, 2000                                                                  |
| <b>Homer protein homolog 1</b>                                                  | <i>Homer1</i>     |                          |                               | 41.41    | membrane-associated | Homer-1                                                                               |                            | Stiber et al, 2008                                                                  |
| <b>Heat shock protein beta-1</b>                                                | <i>Hspb1</i>      | x                        | x                             | 23.014   | Z-disc associated   | Stress-responsive protein 27, Hsp25, HSP27                                            |                            | Koh & Escobedo, 2004                                                                |
| <b>Heat shock protein beta-8</b>                                                | <i>Hspb8</i>      | x                        | x                             | 21.53    | Z-disc associated   | Alpha-crystallin C chain, Protein kinase H11, Small stress protein-like protein HSP22 |                            | Baker et al, 2010                                                                   |
| <b>Immunoglobulin-like and fibronectin type III domain-containing protein 1</b> | <i>Igfn1</i>      |                          |                               | 303.65   | membrane-associated | KY-interacting protein 1                                                              |                            | Baker et al, 2010                                                                   |
| <b>Integrin beta-1-binding protein 2</b>                                        | <i>Itgb1bp2</i>   | x                        |                               | 38.77    | membrane-associated | Melusin                                                                               |                            | Brancaccio et al, 1999                                                              |
| <b>Integrin beta-1-binding protein 2</b>                                        | <i>Itgb1bp2</i>   | x                        |                               | 38.77    | membrane-associated | CHORDC3, ITGB1BP, Melusin                                                             | costamere region           | Brancaccio et al, 1999                                                              |
| <b>Junctophilin-1</b>                                                           | <i>Jph1</i>       | x                        | x                             | 71.90    | membrane-associated | JP1, Junctophilin type 1                                                              |                            | Ito et al, 2001; Takeshima et al, 2015                                              |
| <b>Junctophilin-2</b>                                                           | <i>Jph2</i>       | x                        | x                             | 74.69    | membrane-associated | JP2, Junctophilin type 2                                                              |                            | Takeshima et al, 2000; Minamisawa et al, 2004; Takeshima et al, 2015                |
| <b>Junction plakoglobin</b>                                                     | <i>Jup</i>        | x                        | x                             | 81.8     | membrane-associated | Catenin gamma, CTNNG, Desmoplakin-3, Desmoplakin III, DP3                             | can shuttle to the nucleus | Butz & Larue, 1995; Cifuentes-Diaz et al, 1998; Zhou et al, 2007; Cohen et al, 2014 |

| protein names                                                          | murine gene names | identified in this study | identified as phospho protein | MW [kDa] | sarcomeric subunit    | additional name                                                                      | note | references                             |
|------------------------------------------------------------------------|-------------------|--------------------------|-------------------------------|----------|-----------------------|--------------------------------------------------------------------------------------|------|----------------------------------------|
| <b>Potassium voltage-gated channel subfamily E member 1</b>            | <i>Kcne1</i>      |                          |                               | 14.58    | membrane-associated   | MinK, Delayed rectifier potassium channel subunit IsK                                |      | Furukawa et al, 2001                   |
| <b>Keratin, type I cytoskeletal 19</b>                                 | <i>Krt19</i>      |                          |                               | 44.54    | intermediate filament | cytokeratin19                                                                        |      | Ursitti et al, 2004                    |
| <b>Keratin, type II cytoskeletal 8</b>                                 | <i>Krt8</i>       |                          |                               | 54.56    | intermediate filament | cytokeratin8                                                                         |      | Ursitti et al, 2004                    |
| <b>Kyphoscoliosis peptidase</b>                                        | <i>Ky</i>         |                          |                               | 75.09    | Z-disc associated     | -                                                                                    |      | Baker et al, 2010                      |
| <b>LIM and SH3 domain protein 1</b>                                    | <i>Lasp1</i>      | x                        | x                             | 29.99    | peripheral            | Metastatic lymph node gene 50 protein, MLN50                                         |      | Li et al, 2004                         |
| <b>LIM domain-binding protein 3</b>                                    | <i>Ldb3</i>       | x                        | x                             | 76.43    | Z-disc                | ORACLE, PDLIM6, Protein cypher, ZASP, Z-band alternatively spliced PDZ-motif protein |      | Faulkner et al. 1999                   |
| <b>LIM and senescent cell antigen-like-containing domain protein 1</b> | <i>Lims1</i>      | x                        |                               | 44.34    | peripheral            | Particularly interesting new Cys-His protein 1, PINCH1                               |      | Meder et al, 2011                      |
| <b>Myotilin</b>                                                        | <i>Myot</i>       | x                        | x                             | 55.32    | Z-disc                | 57 kDa cytoskeletal protein, LGMD1A, Myofibrillar titin-like Ig domains protein      |      | Salmikangas et al, 1999                |
| <b>Myozenin1</b>                                                       | <i>Myoz1</i>      |                          |                               | 31.46    | Z-disc                | Calsarcin-2, FATZ, Filamin-, actinin-and telethonin-binding protein                  |      | Faulkner et al, 2000; Frey et al, 2000 |

| protein names                                     | murine gene names | identified in this study | identified as phospho protein | MW [kDa] | sarcomeric subunit  | additional name                                                                             | note        | references             |
|---------------------------------------------------|-------------------|--------------------------|-------------------------------|----------|---------------------|---------------------------------------------------------------------------------------------|-------------|------------------------|
| <b>Myozenin-2</b>                                 | <i>Myoz2</i>      | x                        | x                             | 29.76    | Z-disc              | Calsarcin-1, FATZ-related protein 2,                                                        |             | Frey et al, 2000       |
| <b>Myozenin-3</b>                                 | <i>Myoz3</i>      |                          |                               | 26.98    | Z-disc              | Calsarcin-3, FATZ-related protein 3                                                         |             | Frey & Olson, 2002     |
| <b>Myopalladin</b>                                | <i>Mypn</i>       | x                        | x                             | 144.11   | Z-disc              | 145 kDa sarcomeric protein                                                                  |             | Bang et al, 2001       |
| <b>Protein Neb</b>                                | <i>Neb</i>        | x                        | x                             | 828.65   | Z-disc              | NEM2                                                                                        |             | Wang & Wright, 1988    |
| <b>Nebulette</b>                                  | <i>Nebi</i>       |                          |                               | 52.20    | Z-disc              | LIM-nebulette, LASP2, LIM and SH3 domain protein 2, Actin-binding Z-disk protein            |             | Zieseniss et al, 2008) |
| <b>Nexilin</b>                                    | <i>Nexn</i>       | x                        | x                             | 72.11    | Z-disc              | F-actin-binding protein, Nelin                                                              |             | Hassel et al, 2009     |
| <b>Nebulin-related-anchoring protein</b>          | <i>Nrap</i>       | x                        |                               | 195.75   | intercalated disc   |                                                                                             |             | Zhang et al, 2001      |
| <b>Obscurin</b>                                   | <i>Obscn</i>      | x                        | x                             | 815.63   | Z-disc              | Obscurin-myosin light chain kinase, Obscurin-RhoGEF                                         |             | Young et al, 2001      |
| <b>Protein Obsl1</b>                              | <i>Obsl1</i>      | x                        | x                             | 197.93   | Z-disc              |                                                                                             |             | Geisler et al, 2007    |
| <b>p21 protein (Cdc42/Rac)-activated kinase 1</b> | <i>Pak1</i>       | x                        | x                             | 60.607   | membrane-associated | Alpha-PAK, p21-activated kinase 1, p65-PAK, PAKalpha, Serine/threonine-protein kinase PAK 1 | also Z-disc | Ke <i>et al</i> , 2004 |

| protein names                                   | murine gene names | identified in this study | identified as phospho protein | MW [kDa] | sarcomeric subunit  | additional name                                                                                                | note             | references                                                                |
|-------------------------------------------------|-------------------|--------------------------|-------------------------------|----------|---------------------|----------------------------------------------------------------------------------------------------------------|------------------|---------------------------------------------------------------------------|
| <b>Palladin</b>                                 | <i>Palld</i>      | x                        | x                             | 152.13   | Z-disc              | PNCA1, Sarcoma antigen NY-SAR-77                                                                               | embryonic Z-disc | Parast & Otey, 2000                                                       |
| <b>Alpha-parvin</b>                             | <i>Parva</i>      | x                        | x                             | 42.33    | membrane-associated | Actopaxin, Calponin-like integrin-linked kinase-binding protein, Matrix-remodeling-associated protein 2, MXRA2 |                  | Olski <i>et al</i> , 2001; Chen <i>et al</i> , 2005; Sepulveda & Wu, 2006 |
| <b>Beta-parvin</b>                              | <i>Parvb</i>      | x                        |                               | 41.67    | membrane-associated | Affixin                                                                                                        | also costamere   | Yamaji <i>et al</i> , 2001; Sepulveda & Wu, 2006                          |
| <b>PDZ and LIM domain protein 1</b>             | <i>Pdlim1</i>     | x                        | x                             | 35.77    | Z-disc              | CLIM1, C-terminal LIM domain protein 1, Elfin, hCLIM1, LIM domain protein CLP-36                               |                  | Kotaka <i>et al</i> . 2000                                                |
| <b>PDZ and LIM domain protein 3</b>             | <i>Pdlim3</i>     | x                        | x                             | 34.30    | Z-disc              | Actinin-associated LIM protein, ALP, Alpha-actinin-2-associated LIM protein                                    |                  | Xia <i>et al</i> , 1997                                                   |
| <b>PDZ and LIM domain protein 5</b>             | <i>Pdlim5</i>     | x                        | x                             | 63.30    | Z-disc              | ENH1, Enigma homolog, Enigma-like PDZ and LIM domains protein                                                  |                  | Nakagawa <i>et al</i> , 2000                                              |
| <b>Phosphoglucomutase-like protein 5</b>        | <i>Pgm5</i>       | x                        | x                             | 62.22    | Z-disc              | Aciculin, Phosphoglucomutase-related protein                                                                   |                  | Molt <i>et al</i> , 2014; Belkin & Burridge, 1995                         |
| <b>Phosphatidylinositol 4,5-bisphosphate 3-</b> | <i>Pik3ca</i>     | x                        |                               | 124.41   | Z-disc              | -                                                                                                              |                  | Waardenberg <i>et al</i> , 2011                                           |

| protein names                                                                  | murine gene names | identified in this study | identified as phospho protein | MW [kDa] | sarcomeric subunit  | additional name                                                                     | note                     | references           |
|--------------------------------------------------------------------------------|-------------------|--------------------------|-------------------------------|----------|---------------------|-------------------------------------------------------------------------------------|--------------------------|----------------------|
| <b>kinase catalytic subunit alpha isoform</b>                                  |                   |                          |                               |          |                     |                                                                                     |                          |                      |
| <b>Plakophilin 2</b>                                                           | <i>Pkp2</i>       | x                        |                               | 88.10    | intercalated disc   | -                                                                                   | also peripherhy          | Goossens et al, 2007 |
| <b>Plectin</b>                                                                 | <i>Plec</i>       | x                        | x                             | 517.28   | peripheral          | Hemidesmosomal protein 1                                                            |                          | Hijikata et al, 1999 |
| <b>Serine/threonine-protein phosphatase 2B catalytic subunit alpha isoform</b> | <i>Ppp3ca</i>     | x                        |                               | 57.61    | Z-disc              | Calmodulin-dependent calcineurin A subunit alpha isoform, CAM-PRP catalytic subunit |                          | Frey et al. 2000     |
| <b>Presenilin-1</b>                                                            | <i>Psen1</i>      | x                        | x                             | 52.64    | membrane-associated | AD3, FAD, PSNL1                                                                     |                          | Sakuma et al, 2006   |
| <b>Presenilin-2</b>                                                            | <i>Psen2</i>      |                          |                               | 49.98    | membrane-associated | Ad4h, Ps-2, Psnl2                                                                   |                          | Takeda et al, 2005   |
| <b>Paxillin</b>                                                                | <i>Pxn</i>        | x                        | x                             | 64.51    | peripheral          | -                                                                                   |                          | Gehmlich et al, 2007 |
| <b>Ryanodine receptor 2</b>                                                    | <i>Ryr2</i>       |                          |                               | 564.82   | membrane-associated | -                                                                                   |                          | Lanner et al, 2010   |
| <b>Sodium channel protein</b>                                                  | <i>Scn1a</i>      |                          |                               | 19.37    | intercalated disc   | Nav1.1                                                                              | also membrane associated | Haufe et al, 2005    |
| <b>Alpha-sarcoglycan</b>                                                       | <i>Sgca</i>       | x                        |                               | 43.29    | membrane-associated | 50 kDa dystrophin-associated glycoprotein, Adhalin                                  |                          | Wakayama et al, 1996 |
| <b>Beta-sarcoglycan</b>                                                        | <i>Sgcb</i>       | x                        |                               | 34.87    | membrane-associated | 43 kDa dystrophin-associated glycoprotein, LGMD2E                                   |                          | Durbeej et al, 2000  |
| <b>Delta-sarcoglycan</b>                                                       | <i>Sgcd</i>       | x                        |                               | 32.13    | membrane-associated | 35 kDa dystrophin-associated                                                        |                          | Nigro et al, 1996    |



| protein names                                                  | murine gene names | identified in this study | identified as phospho protein | MW [kDa] | sarcomeric subunit    | additional name                                                           | note                                          | references                                              |
|----------------------------------------------------------------|-------------------|--------------------------|-------------------------------|----------|-----------------------|---------------------------------------------------------------------------|-----------------------------------------------|---------------------------------------------------------|
|                                                                |                   |                          |                               |          |                       | glycoprotein, LGMD2F                                                      |                                               |                                                         |
| <b>Epsilon-sarcoglycan</b>                                     | <i>Sgce</i>       | x                        |                               | 53.53    | membrane-associated   | -                                                                         |                                               | Ettinger et al, 1997                                    |
| <b>Gamma-sarcoglycan</b>                                       | <i>Sgcg</i>       | x                        |                               | 32.08    | membrane-associated   | 35 kDa dystrophin-associated glycoprotein, LGMD2C                         |                                               | Hack et al, 2000                                        |
| <b>SH3 domain-binding glutamic acid-rich protein</b>           | <i>Sh3bgr</i>     |                          |                               | 23.10    | Z-disc                | SH3BGR protein                                                            |                                               | Jang et al, 2015                                        |
| <b>Band anion transport protein</b>                            | <i>Slc4a1</i>     |                          |                               | 103.14   | intercalated disc     | Solute carrier family 4 member 1                                          |                                               | Moura Lima et al, 2003                                  |
| <b>Sodium/calcium exchanger 1</b>                              | <i>Slc8a1</i>     |                          |                               | 108.04   | membrane-associated   | Ncx1                                                                      |                                               | Mohler et al, 2005                                      |
| <b>Alpha-1-syntrophin</b>                                      | <i>Snta1</i>      | x                        | x                             | 53.66    | membrane-associated   | 59 kDa dystrophin-associated protein A1 acidic component 1                |                                               | Peters et al, 1998                                      |
| <b>Isoform 2 of Sorbin and SH3 domain-containing protein 2</b> | <i>Sorbs2</i>     | x                        | x                             | 145.01   | Z-disc associated     | Arg/Abl-interacting protein 2, Sorbin and SH3 domain-containing protein 2 | also costamere region and membrane-associated | Rönty et al, 2005; Wang et al, 1997; Sanger et al, 2010 |
| <b>Sorcin</b>                                                  | <i>Sri</i>        | x                        |                               | 21.63    | membrane-associated   | 22 kDa protein, CP22                                                      | Sarcoplasmic reticulum                        | Meyers et al, 1995                                      |
| <b>Syncoilin</b>                                               | <i>Sync</i>       | x                        | x                             | 53.63    | Z-disc                | SYNC1, Syncoilin intermediate filament 1                                  | also sarcolemma                               | Kemp et al, 2009; Moorwood, 2008                        |
| <b>Synemin</b>                                                 | <i>Synm</i>       | x                        |                               | 173.21   | intermediate filament |                                                                           |                                               | Carlsson et al, 2000                                    |

| protein names                                                 | murine gene names | identified in this study | identified as phospho protein | MW [kDa] | sarcomeric subunit  | additional name                              | note               | references                               |
|---------------------------------------------------------------|-------------------|--------------------------|-------------------------------|----------|---------------------|----------------------------------------------|--------------------|------------------------------------------|
| <b>Synaptopodin</b>                                           | <i>Synpo</i>      | x                        | x                             | 96.25    | Z-disc              |                                              |                    | Linnemann et al, 2010                    |
| <b>Synaptopodin-2</b>                                         | <i>Synpo2</i>     | x                        | x                             | 116.53   | Z-disc              | Myopodin, genethonin-2, fesselin             |                    | Linnemann et al, 2010                    |
| <b>Synaptopodin 2-like protein</b>                            | <i>Synpo2l</i>    | x                        | x                             | 103.27   | Z-disc              | Tritopodin, CHAP                             |                    | Beqqali et al, 2010                      |
| <b>Telethonin</b>                                             | <i>Tcap</i>       | x                        | x                             | 19.07    | Z-disc              | LGMD2G, T-cap, Titin cap protein             |                    | Gregorio et al, 1998                     |
| <b>Talin-2</b>                                                | <i>Tln2</i>       | x                        | x                             | 271.66   | peripheral          | -                                            |                    | Senetar et al, 2007                      |
| <b>Tripartite motif-containing protein 54</b>                 | <i>Trim54</i>     | x                        |                               | 41.13    | Z-disc              | MURF-3, Muscle-specific RING finger protein, |                    | Gregorio et al, 2005                     |
| <b>Titin</b>                                                  | <i>Ttn</i>        | x                        | x                             | 3716     | Z-disc              | Connectin, LGMD2J                            | aa 1-700 in Z-disc | Labeit et al, 1992                       |
| <b>Utrophin</b>                                               | <i>Utrn</i>       | x                        | x                             | 392.70   | membrane-associated | Dmdl protein, dystrophin-related protein     | sarcolemma         | Helliwell et al, 1992                    |
| <b>Vasodilator-stimulated phosphoprotein</b>                  | <i>Vasp</i>       | x                        | x                             | 39.67    | Z-disc              | -                                            |                    | van der Ven et al, 2006                  |
| <b>Vinculin</b>                                               | <i>Vcl</i>        | x                        | x                             | 116.72   | peripheral          | Metavinculin                                 |                    | Shear & Bloch, 1985; Minetti et al, 1992 |
| <b>Vacuolar protein sorting-associated protein 18 homolog</b> | <i>Vps18</i>      | x                        |                               | 110.22   | Z-disc              | hVPS18                                       |                    | van der Ven et al, 2006                  |
| <b>Wiskott-Aldrich syndrome protein homolog</b>               | <i>Was</i>        |                          |                               | 54.19    | Z-disc              | Wasp                                         |                    | Takano et al, 2010                       |

| protein names                                        | murine gene names | identified in this study | identified as phospho protein | MW [kDa] | sarcomeric subunit | additional name                                                        | note | references              |
|------------------------------------------------------|-------------------|--------------------------|-------------------------------|----------|--------------------|------------------------------------------------------------------------|------|-------------------------|
| <b>Xin actin-binding repeat-containing protein 1</b> | <i>Xirp1</i>      | x                        | x                             | 123.43   | Z-disc             | Cardiomyopathy-associated protein 1, CMYA1, XIN                        |      | van der Ven et al, 2006 |
| <b>Xin actin-binding repeat-containing protein 2</b> | <i>Xirp2</i>      |                          |                               | 428.26   | Z-disc             | Cardiomyopathy-associated protein 3, CMYA2, Beta-xin, Xeplin, Myomaxin |      | Huang et al, 2006       |
| <b>Zyxin</b>                                         | <i>Zyx</i>        | x                        | x                             | 60.55    | peripheral         | -                                                                      |      | Crawford et al, 1992    |

## References

- Arndt, V., Dick, N., Tawo, R., Dreiseidler, M., Wenzel, D., Hesse, M., Fürst, D. O., Saftig, P., Saint, R., Fleischmann, B. K., Hoch, M., and Höhfeld, J. (2010) Chaperone-assisted selective autophagy is essential for muscle maintenance. *Curr. Biol.* 20, 143-148
- Baker, J., Riley, G., Romero, M. R., Haynes, A. R., Hilton, H., Simon, M., Hancock, J., Tateossian, H., Ripoll, V. M., and Blanco, G. (2010) Identification of a Z-band associated protein complex involving KY, FLNC and IGFN1. *Exp. Cell Res.* 316, 1856-1870
- Bang, M. L., Mudry, R. E., McElhinny, A. S., Trombitás, K., Geach, A. J., Yamasaki, R., Sorimachi, H., Granzier, H., Gregorio, C. C., and Labeit, S. (2001) Myopalladin, a novel 145-kilodalton sarcomeric protein with multiple roles in Z-disc and I-band protein assemblies. *J. Cell Biol.* 153, 413-427
- Beggs, A. H., Byers, T. J., Knoll, J. H., Boyce, F. M., Bruns, G. A., and Kunkel, L. M. (1992) Cloning and characterization of two human skeletal muscle alpha-actinin genes located on chromosomes 1 and 11. *J. Biol. Chem.* 267, 9281-9288

- Belkin, A. M., and Burridge, K. (1994) Expression and localization of the phosphoglucomutase-related cytoskeletal protein, aciculin, in skeletal muscle. *J. Cell Sci.* 107 ( Pt 7, 1993-2003
- Belkin, A. M., and Burridge, K. (1995) Association of aciculin with dystrophin and utrophin. *J. Biol. Chem.* 270, 6328-6337
- Benz, P. M., Merkel, C. J., Offner, K., Abeßer, M., Ullrich, M., Fischer, T., Bayer, B., Wagner, H., Gambaryan, S., Ursitti, J. A., Adham, I. M., Linke, W. A., Feller, S. M., Fleming, I., Renné, T., Frantz, S., Unger, A., and Schuh, K. (2013) Mena/VASP and  $\alpha$ -Spectrin complexes regulate cytoplasmic actin networks in cardiomyocytes and protect from conduction abnormalities and dilated cardiomyopathy. *Cell Commun. Signal* 11, 56-56
- Beqqali, A., Monshouwer-Kloots, J., Monteiro, R., Welling, M., Bakkers, J., Ehler, E., Verkleij, A., Mummery, C., and Passier, R. (2010) CHAP is a newly identified Z-disc protein essential for heart and skeletal muscle function. *J. Cell Sci.* 123, 1141-1150
- Boyer, J. G., Bhanot, K., Kothary, R., and Boudreau-Larivière, C. (2010) Hearts of dystonia musculorum mice display normal morphological and histological features but show signs of cardiac stress. *PLoS One* 5, e9465-e9465
- Brancaccio, M., Guazzone, S., Menini, N., Sibona, E., Hirsch, E., De Andrea, M., Rocchi, M., Altruda, F., Tarone, G., and Silengo, L. (1999) Melusin is a new muscle-specific interactor for beta(1) integrin cytoplasmic domain. *J. Biol. Chem.* 274, 29282-29288
- Butz, S., and Larue, L. (1995) Expression of catenins during mouse embryonic development and in adult tissues. *Cell Adhes. Commun.* 3, 337-352
- Caldwell, J. E., Waddle, J. A., Cooper, J. A., Hollands, J. A., Casella, S. J., and Casella, J. F. (1989) cDNAs encoding the beta subunit of cap Z, the actin-capping protein of the Z line of muscle. *J. Biol. Chem.* 264, 12648-12652
- Carlsson, L., Li, Z. L., Paulin, D., Price, M. G., Breckler, J., Robson, R. M., Wiche, G., and Thornell, L. E. (2000) Differences in the distribution of synemin, paranemin, and plectin in skeletal muscles of wild-type and desmin knock-out mice. *Histochem. Cell Biol.* 114, 39-47

Casella, J. F., Craig, S. W., Maack, D. J., and Brown, A. E. (1987) Cap Z(36/32), a barbed end actin-capping protein, is a component of the Z-line of skeletal muscle. *J. Cell Biol.* 105, 371-379

Chen, H., Huang, X. N., Yan, W., Chen, K., Guo, L., Tummalapali, L., Dedhar, S., St-Arnaud, R., Wu, C., and Sepulveda, J. L. (2005) Role of the integrin-linked kinase/PINCH1/alpha-parvin complex in cardiac myocyte hypertrophy. *Lab. Invest.* 85, 1342-1356

Chopra, A., Patel, A., Shieh, A. C., Janmey, P. A., and Kresh, J. Y. (2012)  $\alpha$ -Catenin localization and sarcomere self-organization on N-cadherin adhesive patterns are myocyte contractility driven. *PLoS One* 7, e47592-e47592

Christel, C. J., Cardona, N., Mesirca, P., Herrmann, S., Hofmann, F., Striessnig, J., Ludwig, A., Mangoni, M. E., and Lee, A. (2012) Distinct localization and modulation of Cav1.2 and Cav1.3 L-type Ca<sup>2+</sup> channels in mouse sinoatrial node. *J. Physiol.* 590, 6327-6342

Cifuentes-Diaz, C., Goudou, D., Mège, R. M., Velasco, E., Nicolet, M., Herrenknecht, K., Rubin, L., and Rieger, F. (1998) Distinct location and prevalence of alpha-, beta-catenins and gamma-catenin/plakoglobin in developing and denervated skeletal muscle. *Cell Adhes. Commun.* 5, 161-176

Clemen, C. S., Herrmann, H., Strelkov, S. V., and Schröder, R. (2013) Desminopathies: pathology and mechanisms. *Acta Neuropathol.* 125, 47-75

Cohen, S., Lee, D., Zhai, B., Gygi, S. P., and Goldberg, A. L. (2014) Trim32 reduces PI3K-Akt-FoxO signaling in muscle atrophy by promoting plakoglobin-PI3K dissociation. *J. Cell Biol.* 204, 747-758

Crawford, A. W., Michelsen, J. W., and Beckerle, M. C. (1992) An interaction between zyxin and alpha-actinin. *J. Cell Biol.* 116, 1381-1393

Dierck, F., Kuhn, C., Rohr, C., and Frey, N. (2013) CEFIP, a novel sarcomeric Z-disc protein, is modulated in cardiac hypertrophy and directly interacts with FHL2. *Clin. Res. Cardiol.* 102 Suppl

Durbeej, M., Cohn, R. D., Hrstka, R. F., Moore, S. A., Allamand, V., Davidson, B. L., Williamson, R. A., and Campbell, K. P. (2000) Disruption of the beta-sarcoglycan gene reveals pathogenetic complexity of limb-girdle muscular dystrophy type 2E. *Mol. Cell* 5, 141-151

Durbeej, M., Henry, M. D., Ferletta, M., Campbell, K. P., and Ekblom, P. (1998) Distribution of dystroglycan in normal adult mouse tissues. *J. Histochem. Cytochem.* 46, 449-457

Ettinger, A. J., Feng, G., and Sanes, J. R. (1997) epsilon-Sarcoglycan, a broadly expressed homologue of the gene mutated in limb-girdle muscular dystrophy 2D. *J. Biol. Chem.* 272, 32534-32538

Faulkner, G., Pallavicini, A., Comelli, A., Salamon, M., Bortoletto, G., Ievolella, C., Trevisan, S., Kojic, S., Dalla Vecchia, F., Laveder, P., Valle, G., and Lanfranchi, G. (2000) FATZ, a filamin-, actinin-, and telethonin-binding protein of the Z-disc of skeletal muscle. *J. Biol. Chem.* 275, 41234-41242

Faulkner, G., Pallavicini, A., Formentin, E., Comelli, A., Ievolella, C., Trevisan, S., Bortoletto, G., Scannapieco, P., Salamon, M., and Mouly, V. (1999) ZASP: a new Z-band alternatively spliced PDZ-motif protein. *J. Cell Biol.* 146, 465-475

Frey, N., and Olson, E. N. (2002) Calsarcin-3, a novel skeletal muscle-specific member of the calsarcin family, interacts with multiple Z-disc proteins. *J. Biol. Chem.* 277, 13998-14004

Frey, N., Richardson, J. A., and Olson, E. N. (2000) Calsarcins, a novel family of sarcomeric calcineurin-binding proteins. *Proc. Natl. Acad. Sci. U. S. A.* 97, 14632-14637

Furukawa, T., Ono, Y., Tsuchiya, H., Katayama, Y., Bang, M. L., Labeit, D., Labeit, S., Inagaki, N., and Gregorio, C. C. (2001) Specific interaction of the potassium channel beta-subunit minK with the sarcomeric protein T-cap suggests a T-tubule-myofibril linking system. *J. Mol. Biol.* 313, 775-784

Gehmlich, K., Pinotsis, N., Hayess, K., van der Ven, P. F. M., Milting, H., El Banayosy, A., Körfer, R., Wilmanns, M., Ehler, E., and Fürst, D. O. (2007) Paxillin and ponsin interact in nascent costameres of muscle cells. *J. Mol. Biol.* 369, 665-682

Geisler, S. B., Robinson, D., Hauringa, M., Raeker, M. O., Borisov, A. B., Westfall, M. V., and Russell, M. W. (2007) Obscurin-like 1, OBSL1, is a novel cytoskeletal protein related to obscurin. *Genomics* 89, 521-531

Geisler, S. B., Robinson, D., Hauringa, M., Raeker, M. O., Borisov, A. B., Westfall, M. V., and Russell, M. W. (2007) Obscurin-like 1, OBSL1, is a novel cytoskeletal protein related to obscurin. *Genomics* 89, 521-531

Goll, D. E., Dayton, W. R., Singh, I., and Robson, R. M. (1991) Studies of the alpha-actinin/actin interaction in the Z-disk by using calpain. *J. Biol. Chem.* 266, 8501-8510

Goossens, S., Janssens, B., Bonn e, S., De Rycke, R., Braet, F., van Hengel, J., and van Roy, F. (2007) A unique and specific interaction between alphaT-catenin and plakophilin-2 in the area composita, the mixed-type junctional structure of cardiac intercalated discs. *J. Cell Sci.* 120, 2126-2136

Gregorio, C. C., Perry, C. N., and McElhinny, A. S. (2005) Functional properties of the titin/connectin-associated proteins, the muscle-specific RING finger proteins (MURFs), in striated muscle. *J. Muscle Res. Cell Motil.* 26, 389-400

Gregorio, C. C., Trombit s, K., Centner, T., Kolmerer, B., Stier, G., Kunke, K., Suzuki, K., Obermayr, F., Herrmann, B., Granzier, H., Sorimachi, H., and Labeit, S. (1998) The NH2 terminus of titin spans the Z-disc: its interaction with a novel 19-kD ligand (T-cap) is required for sarcomeric integrity. *J. Cell Biol.* 143, 1013-1027

Hack, A. A., Lam, M. Y., Cordier, L., Shoturma, D. I., Ly, C. T., Hadhazy, M. A., Hadhazy, M. R., Sweeney, H. L., and McNally, E. M. (2000) Differential requirement for individual sarcoglycans and dystrophin in the assembly and function of the dystrophin-glycoprotein complex. *J. Cell Sci.* 113 ( Pt 1, 2535-2544

Hassel, D., Dahme, T., Erdmann, J., Meder, B., Hüge, A., Stoll, M., Just, S., Hess, A., Ehlermann, P., Weichenhan, D., Grimmmler, M., Liptau, H., Hetzer, R., Regitz-Zagrosek, V., Fischer, C., Nürnberg, P., Schunkert, H., Katus, H. A., and Rottbauer, W. (2009) Nexilin mutations destabilize cardiac Z-disks and lead to dilated cardiomyopathy. *Nat. Med.* 15, 1281-1288

Haufe, V., Camacho, J. A., Dumaine, R., Günther, B., Bollensdorff, C., von Banchet, G. S., Benndorf, K., and Zimmer, T. (2005) Expression pattern of neuronal and skeletal muscle voltage-gated Na<sup>+</sup> channels in the developing mouse heart. *J. Physiol.* 564, 683-696

Helliwell, T. R., Man, N. T., Morris, G. E., and Davies, K. E. (1992) The dystrophin-related protein, utrophin, is expressed on the sarcolemma of regenerating human skeletal muscle fibres in dystrophies and inflammatory myopathies. *Neuromuscul. Disord.* 2, 177-184

Hijikata, T., Murakami, T., Imamura, M., Fujimaki, N., and Ishikawa, H. (1999) Plectin is a linker of intermediate filaments to Z-discs in skeletal muscle fibers. *J. Cell Sci.* 112, 867-876

Homma, S., Iwasaki, M., Shelton, G. D., Engvall, E., Reed, J. C., and Takayama, S. (2006) BAG3 Deficiency Results in Fulminant Myopathy and Early Lethality. *Am. J. Pathol.* 169, 761-773

Huang, H.-T., Brand, O. M., Mathew, M., Ignatiou, C., Ewen, E. P., McCalmon, S. A., and Naya, F. J. (2006) Myomaxin is a novel transcriptional target of MEF2A that encodes a Xin-related alpha-actinin-interacting protein. *J. Biol. Chem.* 281, 39370-39379

Ito, K., Komazaki, S., Sasamoto, K., Yoshida, M., Nishi, M., Kitamura, K., and Takeshima, H. (2001) Deficiency of triad junction and contraction in mutant skeletal muscle lacking junctophilin type 1. *J. Cell Biol.* 154, 1059-1067



- Jang, D. G., Sim, H. J., Song, E. K., Medina-Ruiz, S., Seo, J. K., and Park, T. J. (2015) A thioredoxin fold protein Sh3bgr regulates Enah and is necessary for proper sarcomere formation. *Dev. Biol.* 405, 1-9
- Jasnic-Savovic, J., Nestorovic, A., Savic, S., Karasek, S., Vitulo, N., Valle, G., Faulkner, G., Radojkovic, D., and Kojic, S. (2015) Profiling of skeletal muscle Ankrd2 protein in human cardiac tissue and neonatal rat cardiomyocytes. *Histochem. Cell Biol.* 143, 583-597
- Ke, Y., Wang, L., Pyle, W. G., de Tombe, P. P., and Solaro, R. J. (2004) Intracellular localization and functional effects of P21-activated kinase-1 (Pak1) in cardiac myocytes. *Circ. Res.* 94, 194-200
- Kemp, M. W., Edwards, B., Burgess, M., Clarke, W. T., Nicholson, G., Parry, D. A. D., and Davies, K. E. (2009) Syncoilin isoform organization and differential expression in murine striated muscle. *J. Struct. Biol.* 165, 196-203
- Koh, T. J., and Escobedo, J. (2004) Cytoskeletal disruption and small heat shock protein translocation immediately after lengthening contractions. *Am. J. Physiol. Cell Physiol.* 286, C713-722
- Kojic, S., Medeot, E., Guccione, E., Krmac, H., Zara, I., Martinelli, V., Valle, G., and Faulkner, G. (2004) The Ankrd2 Protein, a Link Between the Sarcomere and the Nucleus in Skeletal Muscle. *J. Mol. Biol.* 339, 313-325
- Kotaka, M., Kostin, S., Ngai, S., Chan, K., Lau, Y., Lee, S. M., Li, H. y., Ng, E. K., Schaper, J., Tsui, S. K., Fung, K. p., Lee, C. y., and Waye, M. M. (2000) Interaction of hCLIM1, an enigma family protein, with alpha-actinin 2. *J. Cell. Biochem.* 78, 558-565
- Kurth, T., Schwarz, H., Schneider, S., and Hausen, P. (1996) Fine structural immunocytochemistry of catenins in amphibian and mammalian muscle. *Cell Tissue Res.* 286, 1-12
- Labeit, S., Gautel, M., Lakey, A., and Trinick, J. (1992) Towards a molecular understanding of titin. *EMBO J.* 11, 1711-1716

Lanner, J. T., Georgiou, D. K., Joshi, A. D., and Hamilton, S. L. (2010) Ryanodine receptors: structure, expression, molecular details, and function in calcium release. *Cold Spring Harb. Perspect. Biol.* 2, a003996-a003996

Li, B., Zhuang, L., and Trueb, B. (2004) Zyxin interacts with the SH3 domains of the cytoskeletal proteins LIM-nebulette and Lasp-1. *J. Biol. Chem.* 279, 20401-20410

Linnemann, A., van der Ven, P. F. M., Vakeel, P., Albinus, B., Simonis, D., Bendas, G., Schenk, J. a., Micheel, B., Kley, R. a., and Fürst, D. O. (2010) The sarcomeric Z-disc component myopodin is a multiadapter protein that interacts with filamin and alpha-actinin. *Eur. J. Cell Biol.* 89, 681-692

Lu, L., Zhang, Q., Timofeyev, V., Zhang, Z., Young, J. N., Shin, H.-S., Knowlton, A. A., and Chiamvimonvat, N. (2007) Molecular coupling of a Ca<sup>2+</sup>-activated K<sup>+</sup> channel to L-type Ca<sup>2+</sup> channels via alpha-actinin2. *Circ. Res.* 100, 112-120

MacLennan, D. H., and Wong, P. T. (1971) Isolation of a calcium-sequestering protein from sarcoplasmic reticulum. *Proc. Natl. Acad. Sci. U. S. A.* 68, 1231-1235

Matsuda, C., Hayashi, Y. K., Ogawa, M., Aoki, M., Murayama, K., Nishino, I., Nonaka, I., Arahata, K., and Brown, R. H. (2001) The sarcolemmal proteins dysferlin and caveolin-3 interact in skeletal muscle. *Hum. Mol. Genet.* 10, 1761-1766

Meder, B., Huttner, I. G., Sedaghat-Hamedani, F., Just, S., Dahme, T., Frese, K. S., Vogel, B., Koehler, D., Kloos, W., Rudloff, J., Marquart, S., Katus, H. A., and Rottbauer, W. (2011) PINCH proteins regulate cardiac contractility by modulating integrin-linked kinase-protein kinase B signaling. *Mol. Cell. Biol.* 31, 3424-3435

Meyers, M. B., Pickel, V. M., Sheu, S. S., Sharma, V. K., Scotto, K. W., and Fishman, G. I. (1995) Association of sorcin with the cardiac ryanodine receptor. *J. Biol. Chem.* 270, 26411-26418

Minamisawa, S., Oshikawa, J., Takeshima, H., Hoshijima, M., Wang, Y., Chien, K. R., Ishikawa, Y., and Matsuoka, R. (2004) Junctophilin type 2 is associated with caveolin-3 and is down-regulated in the hypertrophic and dilated cardiomyopathies. *Biochem. Biophys. Res. Commun.* 325, 852-856

Minetti, C., Beltrame, F., Marcenaro, G., and Bonilla, E. (1992) Dystrophin at the plasma membrane of human muscle fibers shows a costameric localization. *Neuromuscul. Disord.* 2, 99-109

Mohler, P. J., Davis, J. Q., and Bennett, V. (2005) Ankyrin-B coordinates the Na/K ATPase, Na/Ca exchanger, and InsP3 receptor in a cardiac T-tubule/SR microdomain. *PLoS Biol.* 3, e423-e423

Mohler, P. J., Schott, J.-J., Gramolini, A. O., Dilly, K. W., Guatimosim, S., duBell, W. H., Song, L.-S., Haurogné, K., Kyndt, F., Ali, M. E., Rogers, T. B., Lederer, W. J., Escande, D., Le Marec, H., and Bennett, V. (2003) Ankyrin-B mutation causes type 4 long-QT cardiac arrhythmia and sudden cardiac death. *Nature* 421, 634-639

Molt, S., Buhrdel, J. B., Yakovlev, S., Schein, P., Orfanos, Z., Kirfel, G., Winter, L., Wiche, G., van der Ven, P. F. M., Rottbauer, W., Just, S., Belkin, A. M., and Furst, D. O. (2014) Aciculin interacts with filamin C and Xin and is essential for myofibril assembly, remodeling and maintenance. *J. Cell Sci.* 127, 3578-3592

Moorwood, C. (2008) Syncoilin, an intermediate filament-like protein linked to the dystrophin associated protein complex in skeletal muscle. *CMLS Cell. Mol. Life Sci.* 65, 2957-2963

Moura Lima, P. R., Salles, T. S. I., Costa, F. F., and Saad, S. T. O. (2003) Alpha-cardiac actin (ACTC) binds to the band 3 (AE1) cardiac isoform. *J. Cell. Biochem.* 89, 1215-1221

Nakagawa, N., Hoshijima, M., Oyasu, M., Saito, N., Tanizawa, K., and Kuroda, S. (2000) ENH, containing PDZ and LIM domains, heart/skeletal muscle-specific protein, associates with cytoskeletal proteins through the PDZ domain. *Biochem. Biophys. Res. Commun.* 272, 505-512

Niederländer, N., Fayein, N. A., Auffray, C., and Pomies, P. (2004) Characterization of a new human isoform of the enigma homolog family specifically expressed in skeletal muscle. *Biochem. Biophys. Res. Commun.* 325, 1304-1311

Nigro, V., de Sá Moreira, E., Piluso, G., Vainzof, M., Belsito, A., Politano, L., Puca, A. A., Passos-Bueno, M. R., and Zatz, M. (1996) Autosomal recessive limb-girdle muscular dystrophy, LGMD2F, is caused by a mutation in the delta-sarcoglycan gene. *Nat. Genet.* 14, 195-198

Olski, T. M., Noegel, A. A., and Korenbaum, E. (2001) Parvin, a 42 kDa focal adhesion protein, related to the alpha-actinin superfamily. *J. Cell Sci.* 114, 525-538

Parast, M. M., and Otey, C. A. (2000) Characterization of palladin, a novel protein localized to stress fibers and cell adhesions. *J. Cell Biol.* 150, 643-656

Peters, M. F., Adams, M. E., and Froehner, S. C. (1997) Differential association of syntrophin pairs with the dystrophin complex. *J. Cell Biol.* 138, 81-93

Peters, M. F., Sadoulet-Puccio, H. M., Grady, M. R., Kramarcy, N. R., Kunkel, L. M., Sanes, J. R., Sealock, R., and Froehner, S. C. (1998) Differential membrane localization and intermolecular associations of alpha-dystrobrevin isoforms in skeletal muscle. *J. Cell Biol.* 142, 1269-1278

Pinder, J. C., Taylor-Harris, P. M., Bennett, P. M., Carter, E., Hayes, N. V. L., King, M. D. A., Holt, M. R., Maggs, A. M., Gascard, P., and Baines, A. J. (2012) Isoforms of protein 4.1 are differentially distributed in heart muscle cells: Relation of 4.1R and 4.1G to components of the Ca<sup>2+</sup> homeostasis system. *Exp. Cell Res.* 318, 1467-1479

Poon, E., Howman, E. V., Newey, S. E., and Davies, K. E. (2002) Association of syncoilin and desmin: linking intermediate filament proteins to the dystrophin-associated protein complex. *J. Biol. Chem.* 277, 3433-3439

Ribeiro, E. d. A., Pinotsis, N., Ghisleni, A., Salmazo, A., Konarev, P. V., Kostan, J., Sjöblom, B., Schreiner, C., Polyansky, A. A., Gkougkoulia, E. A., Holt, M. R., Aachmann, F. L., Zagrović, B., Bordignon, E., Pirker, K. F., Svergun, D. I., Gautel, M., and Djinović-Carugo, K. (2014) The structure and regulation of human muscle  $\alpha$ -actinin. *Cell* 159, 1447-1460

Richardson, F. L., Stromer, M. H., Huiatt, T. W., and Robson, R. M. (1981) Immunoelectron and immunofluorescence localization of desmin in mature avian muscles. *Eur. J. Cell Biol.* 26, 91-101

Rönty, M., Taivainen, A., Moza, M., Kruh, G. D., Ehler, E., and Carpen, O. (2005) Involvement of palladin and alpha-actinin in targeting of the Abl/Arg kinase adaptor ArgBP2 to the actin cytoskeleton. *Exp. Cell Res.* 310, 88-98

Rothberg, K. G., Heuser, J. E., Donzell, W. C., Ying, Y. S., Glenney, J. R., and Anderson, R. G. (1992) Caveolin, a protein component of caveolae membrane coats. *Cell* 68, 673-682

Sakuma, K., Nakao, R., Yamasa, Y., and Yasuhara, M. (2006) Normal distribution of presenilin-1 and nicastrin in skeletal muscle and the differential responses of these proteins after denervation. *Biochim. Biophys. Acta* 1760, 980-987

Salmikangas, P., Mykkänen, O. M., Grönholm, M., Heiska, L., Kere, J., and Carpén, O. (1999) Myotilin, a novel sarcomeric protein with two Ig-like domains, is encoded by a candidate gene for limb-girdle muscular dystrophy. *Hum. Mol. Genet.* 8, 1329-1336

Sanger, J. M., Wang, J., Gleason, L. M., Chowrashi, P., Dube, D. K., Mittal, B., Zhukareva, V., and Sanger, J. W. (2010) Arg/Abl-binding protein, a Z-body and Z-band protein, binds sarcomeric, costameric, and signaling molecules. *Cytoskeleton* 67, 808-823

Sarparanta, J., Jonson, P. H., Golzio, C., Sandell, S., Luque, H., Screen, M., McDonald, K., Stajich, J. M., Mahjneh, I., Vihola, A., Raheem, O., Penttilä, S., Lehtinen, S., Huovinen, S., Palmio, J., Tasca, G., Ricci, E., Hackman, P., Hauser, M., Katsanis, N., and Udd, B. (2012) Mutations affecting the cytoplasmic functions of the co-chaperone DNAJB6 cause limb-girdle muscular dystrophy. *Nat. Genet.* 44, 450-455, S451-452

Scott, B. T., Simmerman, H. K., Collins, J. H., Nadal-Ginard, B., and Jones, L. R. (1988) Complete amino acid sequence of canine cardiac calsequestrin deduced by cDNA cloning. *J. Biol. Chem.* 263, 8958-8964

Seeber, S., Becker, K., Rau, T., Eschenhagen, T., Becker, C. M., and Herkert, M. (2000) Transient expression of NMDA receptor subunit NR2B in the developing rat heart. *J. Neurochem.* 75, 2472-2477

Senetar, M. A., Moncman, C. L., and McCann, R. O. (2007) Talin2 is induced during striated muscle differentiation and is targeted to stable adhesion complexes in mature muscle. *Cell Motil. Cytoskelet.* 64, 157-173

Sepulveda, J. L., and Wu, C. (2006) The parvins. *CMLS Cell. Mol. Life Sci.* 63, 25-35

Shear, C. R., and Bloch, R. J. (1985) Vinculin in subsarcolemmal densities in chicken skeletal muscle: localization and relationship to intracellular and extracellular structures. *J. Cell Biol.* 101, 240-256

Spaich, S., Will, R. D., Just, S., Spaich, S., Kuhn, C., Frank, D., Berger, I. M., Wiemann, S., Korn, B., Koegl, M., Backs, J., Katus, H. A., Rottbauer, W., and Frey, N. (2012) F-box and leucine-rich repeat protein 22 is a cardiac-enriched F-box protein that regulates sarcomeric protein turnover and is essential for maintenance of contractile function in vivo. *Circ. Res.* 111, 1504-1516

Steiner-Champlaud, M.-F., Schneider, Y., Favre, B., Paulhe, F., Praetzel-Wunder, S., Faulkner, G., Konieczny, P., Raith, M., Wiche, G., Adebola, A., Liem, R. K., Langbein, L., Sonnenberg, A., Fontao, L., and Borradori, L. (2010) BPAG1 isoform-b: complex distribution pattern in striated and heart muscle and association with plectin and alpha-actinin. *Exp. Cell Res.* 316, 297-313

Stiber, J. A., Zhang, Z.-S., Burch, J., Eu, J. P., Zhang, S., Truskey, G. A., Seth, M., Yamaguchi, N., Meissner, G., Shah, R., Worley, P. F., Williams, R. S., and Rosenberg, P. B. (2008) Mice lacking Homer 1 exhibit a skeletal myopathy characterized by abnormal transient receptor potential channel activity. *Mol. Cell. Biol.* 28, 2637-2647

Takano, K., Watanabe-Takano, H., Suetsugu, S., Kurita, S., Tsujita, K., Kimura, S., Karatsu, T., Takenawa, T., and Endo, T. (2010) Nebulin and N-WASP cooperate to cause IGF-1-induced sarcomeric actin filament formation. *Science* 330, 1536-1540

Takeda, T., Asahi, M., Yamaguchi, O., Hikoso, S., Nakayama, H., Kusakari, Y., Kawai, M., Hongo, K., Higuchi, Y., Kashiwase, K., Watanabe, T., Taniike, M., Nakai, A., Nishida, K., Kurihara, S., Donoviel, D. B., Bernstein, A., Tomita, T., Iwatsubo, T., Hori, M., and Otsu, K. (2005) Presenilin 2 regulates the systolic function of heart by modulating Ca<sup>2+</sup> signaling. *FASEB J.* 19, 2069-2071

Takeshima, H., Hoshijima, M., and Song, L.-S. (2015) Ca<sup>2+</sup> microdomains organized by junctophilins. *Cell Calcium* 58, 349-356

Takeshima, H., Komazaki, S., Nishi, M., Iino, M., and Kangawa, K. (2000) Junctophilins: a novel family of junctional membrane complex proteins. *Mol. Cell* 6, 11-22

Thompson, T. G., Chan, Y. M., Hack, A. A., Brosius, M., Rajala, M., Lidov, H. G., McNally, E. M., Watkins, S., and Kunkel, L. M. (2000) Filamin 2 (FLN2): A muscle-specific sarcoglycan interacting protein. *J. Cell Biol.* 148, 115-126

Titeux, M., Brocheriou, V., Xue, Z., Gao, J., Pellissier, J. F., Guicheney, P., Paulin, D., and Li, Z. (2001) Human synemin gene generates splice variants encoding two distinct intermediate filament proteins. *Eur. J. Biochem.* 268, 6435-6449

Tsukamoto, Y., Senda, T., Nakano, T., Nakada, C., Hida, T., Ishiguro, N., Kondo, G., Baba, T., Sato, K., Osaki, M., Mori, S., Ito, H., and Moriyama, M. (2002) Arpp, a new homolog of carp, is preferentially expressed in type 1 skeletal muscle fibers and is markedly induced by denervation. *Lab. Invest.* 82, 645-655

Ursitti, J. A., Lee, P. C., Resneck, W. G., McNally, M. M., Bowman, A. L., O'Neill, A., Stone, M. R., and Bloch, R. J. (2004) Cloning and characterization of cytokeratins 8 and 19 in adult rat striated muscle. Interaction with the dystrophin glycoprotein complex. *J. Biol. Chem.* 279, 41830-41838

van der Ven, P. F. M., Ehler, E., Vakeel, P., Eulitz, S., Schenk, J. A., Milting, H., Micheel, B., and Fürst, D. O. (2006) Unusual splicing events result in distinct Xin isoforms that associate differentially with filamin c and Mena/VASP. *Exp. Cell Res.* 312, 2154-2167

Waardenberg, A. J., Bernardo, B. C., Ng, D. C. H., Shepherd, P. R., Cemerlang, N., Sbroggiò, M., Wells, C. A., Dalrymple, B. P., Brancaccio, M., Lin, R. C. Y., and McMullen, J. R. (2011) Phosphoinositide 3-kinase (PI3K(p110alpha)) directly regulates key components of the Z-disc and cardiac structure. *J. Biol. Chem.* 286, 30837-30846

Wakayama, Y., Inoue, M., Murahashi, M., Shibuya, S., Jimi, T., Kojima, H., and Oniki, H. (1996) Ultrastructural localization of adhalin in normal murine skeletal myofiber. *Ann. Neurol.* 39, 217-223

Wang, B., Golemis, E. A., and Kruh, G. D. (1997) ArgBP2, a multiple Src homology 3 domain-containing, Arg/Abl-interacting protein, is phosphorylated in v-Abl-transformed cells and localized in stress fibers and cardiocyte Z-disks. *J. Biol. Chem.* 272, 17542-17550

Wang, K., and Wright, J. (1988) Architecture of the sarcomere matrix of skeletal muscle: immunoelectron microscopic evidence that suggests a set of parallel inextensible nebulin filaments anchored at the Z line. *J. Cell Biol.* 107, 2199-2212

Williams, T. M., and Lisanti, M. P. (2004) The caveolin proteins. *Genome Biol.* 5, 214-214

Xia, H., Winokur, S. T., Kuo, W. L., Altherr, M. R., and Bretz, D. S. (1997) Actinin-associated LIM protein: identification of a domain interaction between PDZ and spectrin-like repeat motifs. *J. Cell Biol.* 139, 507-515

Yamaji, S., Suzuki, A., Sugiyama, Y., Koide, Y., Yoshida, M., Kanamori, H., Mohri, H., Ohno, S., and Ishigatsubo, Y. (2001) A novel integrin-linked kinase-binding protein, affixin, is involved in the early stage of cell-substrate interaction. *J. Cell Biol.* 153, 1251-1264



Young, P., Ehler, E., and Gautel, M. (2001) Obscurin, a giant sarcomeric Rho guanine nucleotide exchange factor protein involved in sarcomere assembly. *J. Cell Biol.* 154, 123-136

Zhang, J. Q., Elzey, B., Williams, G., Lu, S., Law, D. J., and Horowitz, R. (2001) Ultrastructural and biochemical localization of N-RAP at the interface between myofibrils and intercalated disks in the mouse heart. *Biochemistry* 40, 14898-14906

Zhou, J., Qu, J., Yi, X. P., Graber, K., Huber, L., Wang, X., Gerdes, A. M., and Li, F. (2007) Upregulation of gamma-catenin compensates for the loss of beta-catenin in adult cardiomyocytes. *Am. J. Physiol. Heart Circ. Physiol.* 292, H270-276

Zieseniss, A., Terasaki, A. G., and Gregorio, C. C. (2008) Lasp-2 expression, localization, and ligand interactions: A new Z-disc scaffolding protein. *Cell Motil. Cytoskelet.* 65, 59-72
